# Supplementary material for: Aetiology of Acute Respiratory Tract Infections in Hospitalised Children in Cyprus
Source: PubMed Central journal article supplement (PMC4720120; doi:10.1371/journal.pone.0147041), 2016-01-13
Supplement: pone.0147041.s005.pdf [file pone.0147041.s005.pdf]

S1 Table 1. Pearson Correlation coefficients for observed viral co-infections.

|             | rsv                      | hrv                      | hadv                     | infa                     | hbov                     | hev                      | piv3                     | infb                     | mpv                      | oc43                     | piv1                     | piv4                     | piv2                     | nl63                     | 229E          |
|-------------|--------------------------|--------------------------|--------------------------|--------------------------|--------------------------|--------------------------|--------------------------|--------------------------|--------------------------|--------------------------|--------------------------|--------------------------|--------------------------|--------------------------|---------------|
| <b>rsv</b>  | <b>1.0000</b>            |                          |                          |                          |                          |                          |                          |                          |                          |                          |                          |                          |                          |                          |               |
| <b>hrv</b>  | <b>-0.2103</b><br>0.0000 | <b>1.0000</b>            |                          |                          |                          |                          |                          |                          |                          |                          |                          |                          |                          |                          |               |
| <b>hadv</b> | <b>-0.1463</b><br>0.0025 | <b>-0.0504</b><br>0.3003 | <b>1.0000</b>            |                          |                          |                          |                          |                          |                          |                          |                          |                          |                          |                          |               |
| <b>infa</b> | <b>-0.1346</b><br>0.0055 | <b>-0.1206</b><br>0.0130 | <b>-0.0382</b><br>0.4327 | <b>1.0000</b>            |                          |                          |                          |                          |                          |                          |                          |                          |                          |                          |               |
| <b>hbov</b> | <b>0.0377</b><br>0.4391  | <b>0.0099</b><br>0.8384  | <b>-0.0296</b><br>0.5434 | <b>-0.0651</b><br>0.1807 | <b>1.0000</b>            |                          |                          |                          |                          |                          |                          |                          |                          |                          |               |
| <b>hev</b>  | <b>-0.1131</b><br>0.0198 | <b>0.1333</b><br>0.0060  | <b>-0.0673</b><br>0.1668 | <b>-0.0637</b><br>0.1906 | <b>-0.0136</b><br>0.7800 | <b>1.0000</b>            |                          |                          |                          |                          |                          |                          |                          |                          |               |
| <b>piv3</b> | <b>-0.1131</b><br>0.0198 | <b>-0.0535</b><br>0.2713 | <b>-0.0673</b><br>0.1668 | <b>-0.0637</b><br>0.1906 | <b>-0.0587</b><br>0.2280 | <b>-0.0114</b><br>0.8152 | <b>1.0000</b>            |                          |                          |                          |                          |                          |                          |                          |               |
| <b>infb</b> | <b>-0.1037</b><br>0.0328 | <b>-0.0669</b><br>0.1689 | <b>-0.0641</b><br>0.1876 | <b>-0.0607</b><br>0.2123 | <b>-0.0089</b><br>0.8554 | <b>-0.0547</b><br>0.2613 | <b>-0.0547</b><br>0.2613 | <b>1.0000</b>            |                          |                          |                          |                          |                          |                          |               |
| <b>mpv</b>  | <b>-0.1041</b><br>0.0322 | <b>-0.0660</b><br>0.1749 | <b>-0.0081</b><br>0.8683 | <b>-0.0527</b><br>0.2793 | <b>-0.0485</b><br>0.3190 | <b>-0.0474</b><br>0.3299 | <b>-0.0474</b><br>0.3299 | <b>-0.0452</b><br>0.3531 | <b>1.0000</b>            |                          |                          |                          |                          |                          |               |
| <b>oc43</b> | <b>-0.0284</b><br>0.5597 | <b>-0.0171</b><br>0.7258 | <b>0.0552</b><br>0.2571  | <b>0.0078</b><br>0.8728  | <b>0.0156</b><br>0.7481  | <b>-0.0426</b><br>0.3817 | <b>-0.0426</b><br>0.3817 | <b>-0.0406</b><br>0.4044 | <b>-0.0352</b><br>0.4695 | <b>1.0000</b>            |                          |                          |                          |                          |               |
| <b>piv1</b> | <b>-0.0819</b><br>0.0920 | <b>0.0229</b><br>0.6386  | <b>-0.0479</b><br>0.3248 | <b>-0.0454</b><br>0.3512 | <b>-0.0418</b><br>0.3905 | <b>0.0219</b><br>0.6527  | <b>-0.0409</b><br>0.4012 | <b>-0.0390</b><br>0.4236 | <b>-0.0338</b><br>0.4876 | <b>-0.0304</b><br>0.5331 | <b>1.0000</b>            |                          |                          |                          |               |
| <b>piv4</b> | <b>-0.0263</b><br>0.5898 | <b>-0.0537</b><br>0.2702 | <b>-0.0414</b><br>0.3956 | <b>-0.0392</b><br>0.4212 | <b>0.0347</b><br>0.4756  | <b>-0.0353</b><br>0.4689 | <b>-0.0353</b><br>0.4689 | <b>-0.0336</b><br>0.4900 | <b>-0.0292</b><br>0.5493 | <b>-0.0262</b><br>0.5907 | <b>-0.0251</b><br>0.6058 | <b>1.0000</b>            |                          |                          |               |
| <b>piv2</b> | <b>-0.0857</b><br>0.0780 | <b>0.0035</b><br>0.9423  | <b>0.0347</b><br>0.4759  | <b>-0.0345</b><br>0.4792 | <b>0.0484</b><br>0.3205  | <b>-0.0310</b><br>0.5240 | <b>-0.0310</b><br>0.5240 | <b>-0.0296</b><br>0.5436 | <b>-0.0257</b><br>0.5983 | <b>-0.0230</b><br>0.6361 | <b>-0.0221</b><br>0.6498 | <b>-0.0191</b><br>0.6952 | <b>1.0000</b>            |                          |               |
| <b>nl63</b> | <b>-0.1176</b><br>0.0154 | <b>-0.0478</b><br>0.3265 | <b>0.0026</b><br>0.9574  | <b>0.0078</b><br>0.8728  | <b>0.0748</b><br>0.1239  | <b>-0.0426</b><br>0.3817 | <b>-0.0426</b><br>0.3817 | <b>-0.0406</b><br>0.4044 | <b>0.1084</b><br>0.0257  | <b>-0.0316</b><br>0.5160 | <b>-0.0304</b><br>0.5331 | <b>-0.0262</b><br>0.5907 | <b>0.7285</b><br>0.0000  | <b>1.0000</b>            |               |
| <b>229e</b> | <b>-0.0322</b><br>0.5091 | <b>-0.0298</b><br>0.5400 | <b>0.1731</b><br>0.0003  | <b>-0.0129</b><br>0.7907 | <b>-0.0119</b><br>0.8068 | <b>-0.0116</b><br>0.8110 | <b>-0.0116</b><br>0.8110 | <b>-0.0111</b><br>0.8197 | <b>-0.0096</b><br>0.8433 | <b>-0.0086</b><br>0.8591 | <b>-0.0083</b><br>0.8647 | <b>-0.0072</b><br>0.8831 | <b>-0.0063</b><br>0.8971 | <b>-0.0086</b><br>0.8591 | <b>1.0000</b> |

Under the correlation coefficients, which are indicated in bold, the respective P-values are shown.
